# Supplementary material for: Synthesis of outer tube-selectively nitrogen-doped double-walled carbon nanotubes by nitrogen plasma treatment
Source: Royal Society of Chemistry journal article supplement (doi:10.1039/c8nr03745k), 2018-01-01
Supplement: c8nr03745k1.pdf [file c8nr03745k1.pdf]

Electronic Supplementary Information for

### Synthesis of Outer Tube-selectively Nitrogen-Doped Double-Walled Carbon Nanotubes by Nitrogen Plasma Treatment

Hiroyuki Muramatsu,<sup>\*a</sup> Masahiro Takahashi,<sup>a</sup> Cheon-Soo Kang,<sup>a</sup> Jin Hee Kim,<sup>b</sup> Yoong Ahm Kim,<sup>\*c</sup> and Takuya Hayashi<sup>a</sup>

<sup>a</sup> Faculty of Engineering, Shinshu university, Wakasato, 4-17-1, Nagano, Japan, E-mail: muramatsu@endomoribu.shinshu-u.ac.jp; Fax: +81-26-269-5202; Tel: +81-26-269-5212

<sup>b</sup> Faculty of Engineering, Chonnam National University, 77 Yongbong-ro, Buk-gu, Gwangju, 61186, Republic of Korea

<sup>c</sup> Department of Polymer Engineering, Graduate School, Alan G. MacDiarmid Energy Research Institute & School of Polymer Science and Engineering, Chonnam National University, 77 Yongbong-ro, Buk-gu, Gwangju, 61186, Republic of Korea, E-mail: yak@chonnam.ac.kr

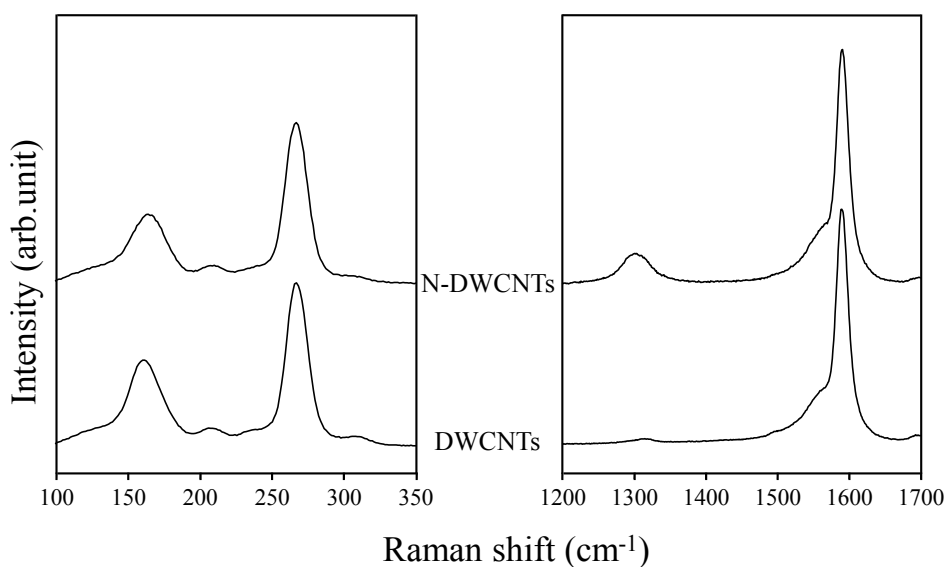

**Figure S1.** Low and high frequency regions of Raman spectra for the pristine and N doped DWCNTs (3 min) using a 785nm laser line.

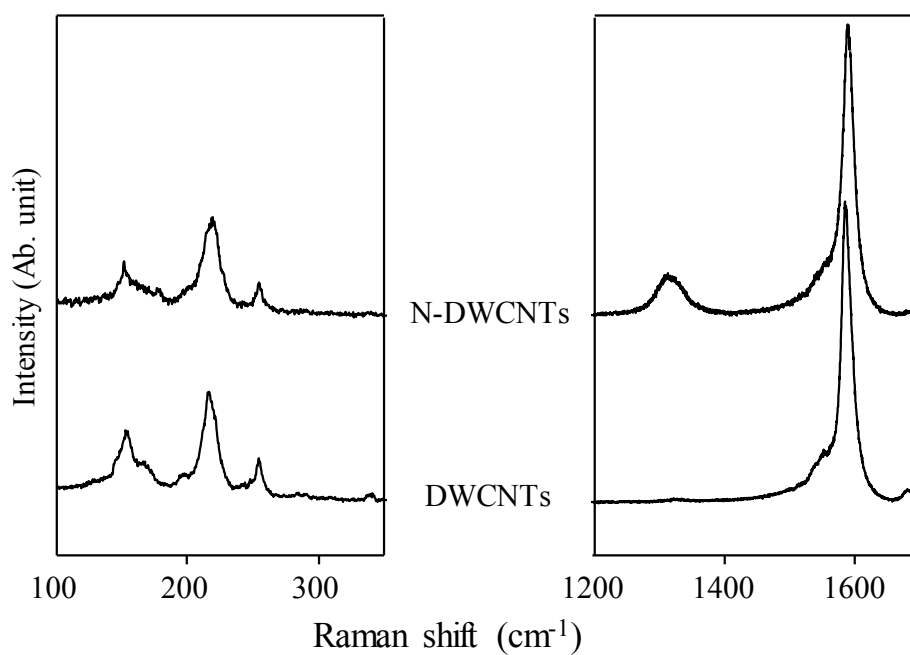

**Figure S2.** Low and high frequency regions of Raman spectra for the pristine and N doped DWCNTs (3 min) using a 633nm laser line.

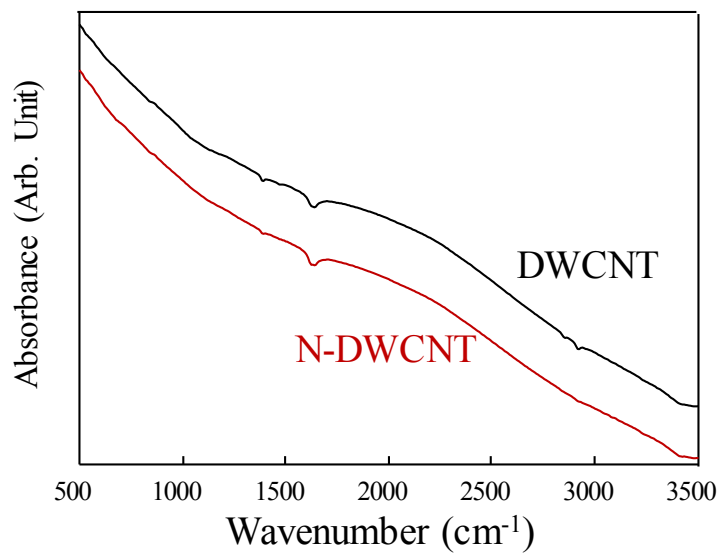

**Figure S3.** FT-IR spectra of DWCNTs before and after nitrogen plasma treatment. Note that plasma treatment we used is 3 min.

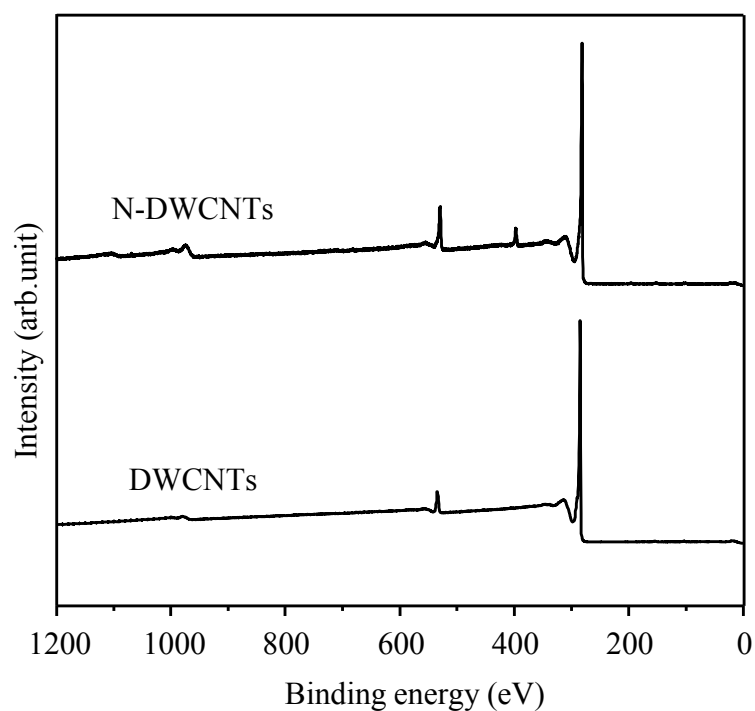

**Figure S4.** Wide-scan XPS spectra of DWCNTs before and after nitrogen plasma treatment (note that plasma treatment time is 3 min.)

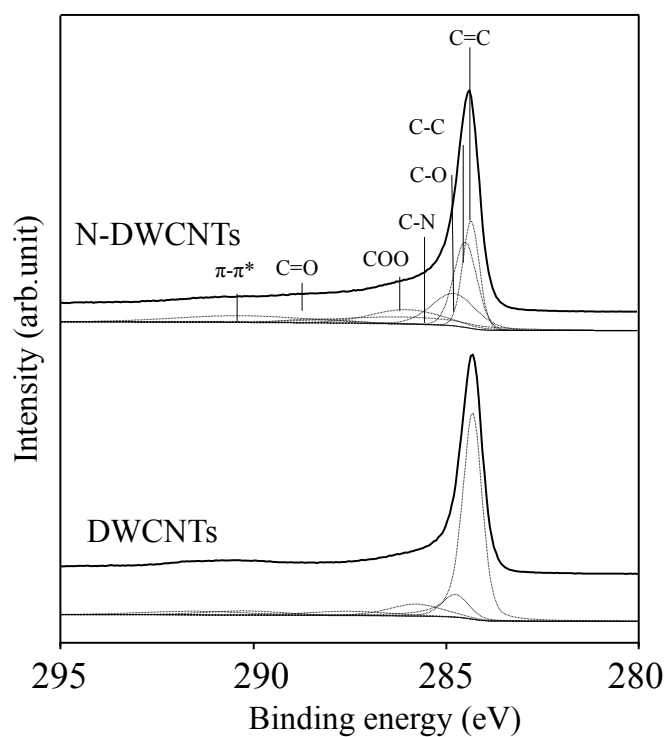

**Figure S5.** C1s XPS spectra of DWCNTs before and after nitrogen plasma treatment (note that plasma treatment time is 3 min.).

**Table S1.** Elemental analysis of DWCNTs before and after nitrogen plasma treatment using XPS.

| sample          | Assignment (atom %) |        |          |
|-----------------|---------------------|--------|----------|
|                 | Carbon              | Oxygen | Nitrogen |
| DWCNTs          | 98.1                | 1.80   | 0        |
| N-DWCNTs (3min) | 87.6                | 8.08   | 4.30     |
